# Supplementary material
Source: publisher site journal article supplement (https://www.dovepress.com/article/346411)
Supplement: Supplementary file 1 [file get_supplementary_file.php]

**Table S1** Nutrient composition of the study diet.

|  | control  group | exogenous  AGE group | dietary  AGE group |
| --- | --- | --- | --- |
| Water (%) | ≦10 | ≦10 | ≦12 |
| crude protein (%) | ≧18 | ≧18 | ≧18 |
| crude fat (%) | ≧4.0 | ≧4.0 | ≧4.0 |
| crude fiber (%) | ≦5.0 | ≦5.0 | ≦5.0 |
| dry matter/ash (%) | ≦8.0 | ≦8.0 | ≦8.0 |
| Calcium (%) | 1.0~1.8 | 1.0~1.8 | 1.0~1.8 |
| Phosphate (%) | 0.6~1.2 | 0.6~1.2 | 0.6~1.2 |
| Lysine (%) | ≧0.82 | ≧0.82 | ≧0.82 |
| methionine and cystine (%) | ≧0.53 | ≧0.53 | ≧0.53 |
| MG-BSA | / | 1 mg/g | / |
| Added vitamin | / | / | 10 mg/g |
| Control chow diet was purchase from Slake Jingda Experimental Animal Co., Ltd. (Hunan, China). | | | |

**Table S2** Taxonomy, CAGs and 92 key OTUs identified by random forest model.

| **OTU** | **MM** | **Color** | **CAG** | **phylum** | **Family** | **Genus** | **Species** |
| --- | --- | --- | --- | --- | --- | --- | --- |
| OTU137 | 0.857 | black | 1 | Bacteroidetes | Bacteroidales_S24-7 | - | - |
| OTU180 | 0.624 | black | 1 | Proteobacteria | Desulfovibrionaceae | - | - |
| OTU190 | 0.843 | black | 1 | Firmicutes | Lachnospiraceae | Ruminococcus | Ruminococcus_gnavus |
| OTU439 | 0.635 | black | 1 | Firmicutes | Ruminococcaceae | Oscillospira | - |
| OTU508 | 0.604 | black | 1 | Firmicutes | Ruminococcaceae | Butyricicoccus | Butyricicoccus_pullicaecorum |
| OTU525 | 0.584 | black | 1 | Firmicutes | Lachnospiraceae | - | - |
| OTU672 | 0.901 | black | 1 | Bacteroidetes | Bacteroidales_S24-7 | - | - |
| OTU81 | 0.809 | black | 1 | Bacteroidetes | Bacteroidales_S24-7 | - | - |
| OTU1 | 0.419 | blue | 2 | Bacteroidetes | Bacteroidales_S24-7 | - | - |
| OTU216 | 0.810 | blue | 2 | Bacteroidetes | Bacteroidales_S24-7 | - | - |
| OTU28 | 0.846 | blue | 2 | Bacteroidetes | Bacteroidales_S24-7 | - | - |
| OTU313 | 0.763 | blue | 2 | Bacteroidetes | Bacteroidales_S24-7 | - | - |
| OTU352 | 0.757 | blue | 2 | Firmicutes | Ruminococcaceae | - | - |
| OTU38 | 0.825 | blue | 2 | Bacteroidetes | Bacteroidales_S24-7 | - | - |
| OTU456 | 0.266 | blue | 2 | Firmicutes | Staphylococcaceae | Jeotgalicoccus | - |
| OTU589 | 0.704 | blue | 2 | Bacteroidetes | Bacteroidaceae | Bacteroides | - |
| OTU606 | 0.746 | blue | 2 | Bacteroidetes | Bacteroidales_S24-7 | - | - |
| OTU741 | 0.704 | blue | 2 | Bacteroidetes | Bacteroidales_S24-7 | - | - |
| OTU760 | 0.705 | blue | 2 | Bacteroidetes | Bacteroidaceae | Bacteroides | - |
| OTU93 | 0.576 | blue | 2 | Bacteroidetes | Bacteroidales_S24-7 | - | - |
| OTU97 | 0.742 | blue | 2 | Firmicutes | Lachnospiraceae | - | - |
| OTU128 | 0.837 | brown | 3 | Firmicutes | Lachnospiraceae | Ruminococcus | Ruminococcus_gnavus |
| OTU130 | 0.891 | brown | 3 | Firmicutes | Lachnospiraceae | Coprococcus | - |
| OTU154 | 0.598 | brown | 3 | Firmicutes | Lachnospiraceae | - | - |
| OTU156 | 0.782 | brown | 3 | Firmicutes | Lachnospiraceae | - | - |
| OTU166 | 0.703 | brown | 3 | Firmicutes | Ruminococcaceae | Ruminococcus | - |
| OTU226 | 0.694 | brown | 3 | Bacteroidetes | Rikenellaceae | - | - |
| OTU244 | 0.871 | brown | 3 | Firmicutes | Ruminococcaceae | Clostridium | Clostridium_methylpentosum |
| OTU260 | 0.882 | brown | 3 | Firmicutes | - | - | - |
| OTU270 | 0.678 | brown | 3 | Bacteroidetes | Porphyromonadaceae | Parabacteroides | Parabacteroides_distasonis |
| OTU280 | 0.414 | brown | 3 | Firmicutes | Ruminococcaceae | Ruminococcus | - |
| OTU337 | 0.788 | brown | 3 | Proteobacteria | Helicobacteraceae | Helicobacter | - |
| OTU361 | 0.810 | brown | 3 | Firmicutes | Lachnospiraceae | - | - |
| OTU45 | 0.752 | brown | 3 | Bacteroidetes | Bacteroidaceae | Bacteroides | - |
| OTU455 | 0.599 | brown | 3 | Firmicutes | Lachnospiraceae | - | - |
| OTU463 | 0.608 | brown | 3 | Firmicutes | - | - | - |
| OTU544 | 0.596 | brown | 3 | Firmicutes | Ruminococcaceae | Clostridium | Clostridium_methylpentosum |
| OTU576 | 0.840 | brown | 3 | Firmicutes | - | - | - |
| OTU88 | 0.484 | brown | 3 | Firmicutes | Ruminococcaceae | Ruminococcus | - |
| OTU118 | 0.692 | red | 4 | Bacteroidetes | Bacteroidales_S24-7 | - | - |
| OTU163 | 0.466 | red | 4 | Bacteroidetes | Bacteroidales_S24-7 | - | - |
| OTU316 | 0.647 | red | 4 | Actinobacteria | Coriobacteriaceae | Adlercreutzia | - |
| OTU403 | 0.692 | red | 4 | Firmicutes | Lachnospiraceae | - | - |
| OTU409 | 0.696 | red | 4 | Firmicutes | - | - | - |
| OTU46 | 0.721 | red | 4 | Bacteroidetes | Bacteroidaceae | Bacteroides | - |
| OTU48 | 0.942 | red | 4 | Bacteroidetes | Bacteroidales_S24-7 | - | - |
| OTU72 | 0.772 | red | 4 | Bacteroidetes | Bacteroidaceae | Bacteroides | Bacteroides_caccae |
| OTU102 | 0.462 | turquoise | 5 | Bacteroidetes | Rikenellaceae | - | - |
| OTU145 | 0.770 | turquoise | 5 | Firmicutes | Lachnospiraceae | - | - |
| OTU164 | 0.682 | turquoise | 5 | Bacteroidetes | Odoribacteraceae | Odoribacter | - |
| OTU201 | 0.699 | turquoise | 5 | Firmicutes | - | - | - |
| OTU205 | 0.594 | turquoise | 5 | Firmicutes | Lachnospiraceae | - | - |
| OTU212 | 0.532 | turquoise | 5 | Firmicutes | Lachnospiraceae | - | - |
| OTU245 | 0.850 | turquoise | 5 | Proteobacteria | mitochondria | Lupinus | Lupinus_luteus |
| OTU27 | 0.890 | turquoise | 5 | Cyanobacteria | - | - | - |
| OTU31 | 0.324 | turquoise | 5 | Bacteroidetes | Bacteroidales_S24-7 | - | - |
| OTU339 | 0.585 | turquoise | 5 | Firmicutes | - | - | - |
| OTU378 | 0.797 | turquoise | 5 | Firmicutes | Lachnospiraceae | - | - |
| OTU383 | 0.457 | turquoise | 5 | Bacteroidetes | Bacteroidaceae | Bacteroides | Bacteroides_uniformis |
| OTU386 | 0.893 | turquoise | 5 | Firmicutes | Lachnospiraceae | - | - |
| OTU710 | 0.880 | turquoise | 5 | Firmicutes | Lachnospiraceae | Ruminococcus | Ruminococcus_gnavus |
| OTU77 | 0.892 | turquoise | 5 | Firmicutes | Erysipelotrichaceae | Allobaculum | - |
| OTU824 | 0.538 | turquoise | 5 | Bacteroidetes | Bacteroidales_S24-7 | - | - |
| OTU135 | 0.889 | yellow | 6 | Firmicutes | Ruminococcaceae | - | - |
| OTU168 | 0.732 | yellow | 6 | Firmicutes | - | - | - |
| OTU282 | 0.861 | yellow | 6 | Firmicutes | Ruminococcaceae | Ruminococcus | - |
| OTU309 | 0.817 | yellow | 6 | Firmicutes | Ruminococcaceae | Ruminococcus | - |
| OTU499 | 0.709 | yellow | 6 | Firmicutes | Ruminococcaceae | - | - |
| OTU51 | 0.515 | yellow | 6 | Bacteroidetes | Bacteroidales_S24-7 | - | - |
| OTU554 | 0.842 | yellow | 6 | Firmicutes | Lachnospiraceae | - | - |
| OTU60 | 0.784 | yellow | 6 | Firmicutes | - | - | - |
| OTU649 | 0.826 | yellow | 6 | Firmicutes | Lachnospiraceae | - | - |
| OTU110 | 0.105 | gray | / | Bacteroidetes | Bacteroidales_S24-7 | - | - |
| OTU155 | 0.482 | gray | / | Tenericutes | Anaeroplasmataceae | Anaeroplasma | - |
| OTU16 | -0.422 | gray | / | Proteobacteria | Desulfovibrionaceae | Desulfovibrio | Desulfovibrio_C21_c20 |
| OTU178 | -0.477 | gray | / | Firmicutes | Lachnospiraceae | - | - |
| OTU179 | 0.498 | gray | / | Firmicutes | Ruminococcaceae | Oscillospira | - |
| OTU206 | 0.166 | gray | / | Cyanobacteria | - | - | - |
| OTU227 | -0.600 | gray | / | Firmicutes | Ruminococcaceae | Oscillospira | - |
| OTU263 | -0.335 | gray | / | Firmicutes | Ruminococcaceae | Ruminococcus | - |
| OTU283 | 0.077 | gray | / | Firmicutes | - | - | - |
| OTU287 | -0.353 | gray | / | Firmicutes | Ruminococcaceae | Ruminococcus | - |
| OTU347 | 0.727 | gray | / | Firmicutes | - | - | - |
| OTU4 | 0.502 | gray | / | Firmicutes | - | - | - |
| OTU40 | 0.133 | gray | / | Firmicutes | Lachnospiraceae | - | - |
| OTU5 | -0.245 | gray | / | Firmicutes | - | - | - |
| OTU503 | 0.143 | gray | / | Firmicutes |  | - | - |
| OTU506 | 0.690 | gray | / | Bacteroidetes | Bacteroidales_S24-7 | - | - |
| OTU744 | -0.121 | gray | / | Firmicutes | - | - | - |
| OTU765 | 0.067 | gray | / | Bacteroidetes | Bacteroidales_S24-7 | - | - |
| OTU90 | 0.490 | gray | / | Bacteroidetes | Bacteroidales_S24-7 | - | - |
| OTU98 | -0.370 | gray | / | Firmicutes | Lachnospiraceae | - | - |
| **Notes:** OTU, operational taxonomic unit; CAGs, co-abundance group; -, unclassified; MM, module membership. | | | | | | | |

***
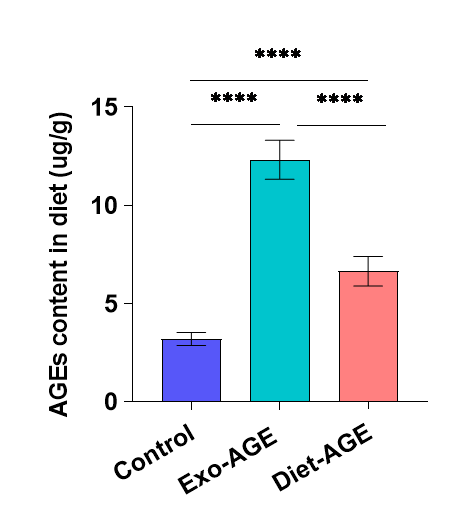
***

**Figure S1.** Advanced glycation end products (AGEs) content in diet. AGEs content in the exogenous AGE and dietary AGE groups was significantly increased than control group. Data were expressed as means ± SD, and differences were analyzed among three groups by one-way ANOVA. ******** P <0.0001.


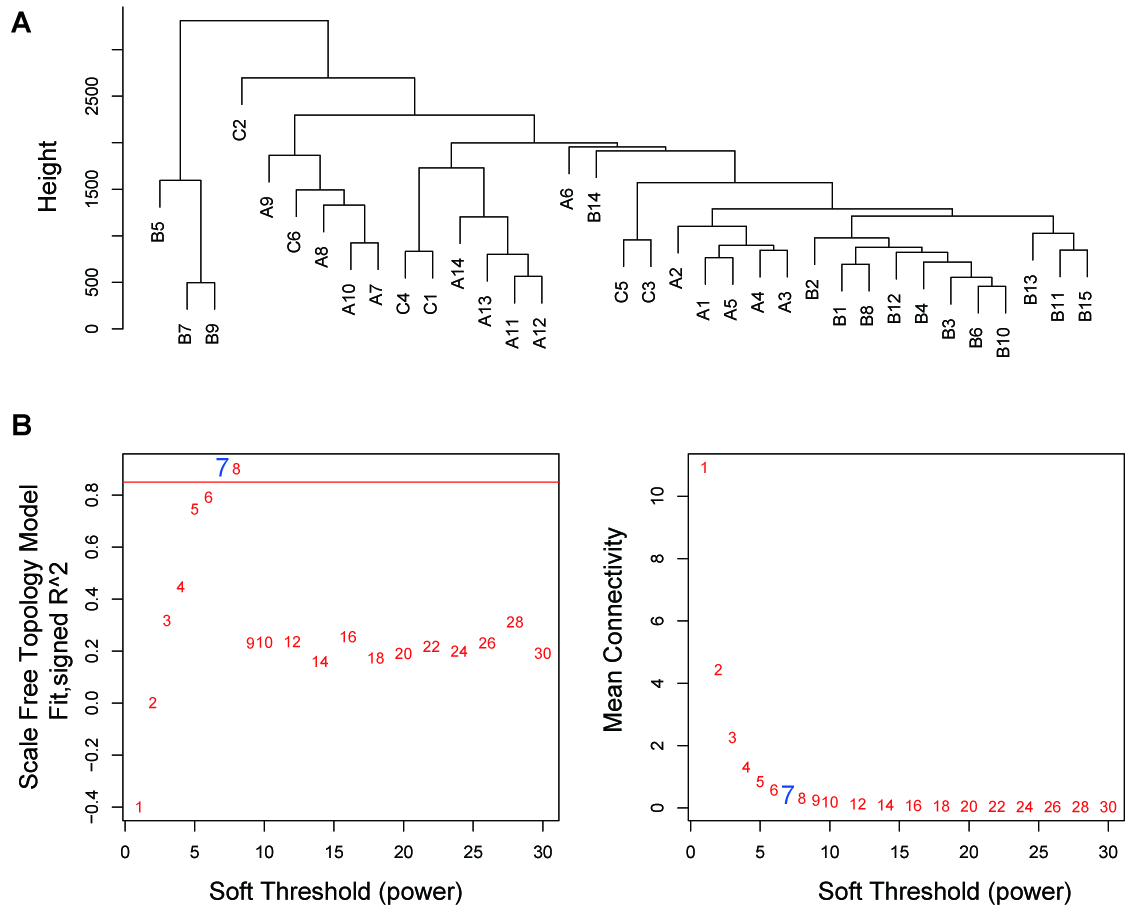


**Figure S2.** (**A**)Clustering dendrogram of samples. Sample clustering was conducted to detect outliers. (**B**) Calculation and selection of optimal soft-thresholding rule. Influence of different powers on the scale independence (left) and on the mean connectivity (right). The blue number 7 indicates the selected soft-thresholding power.


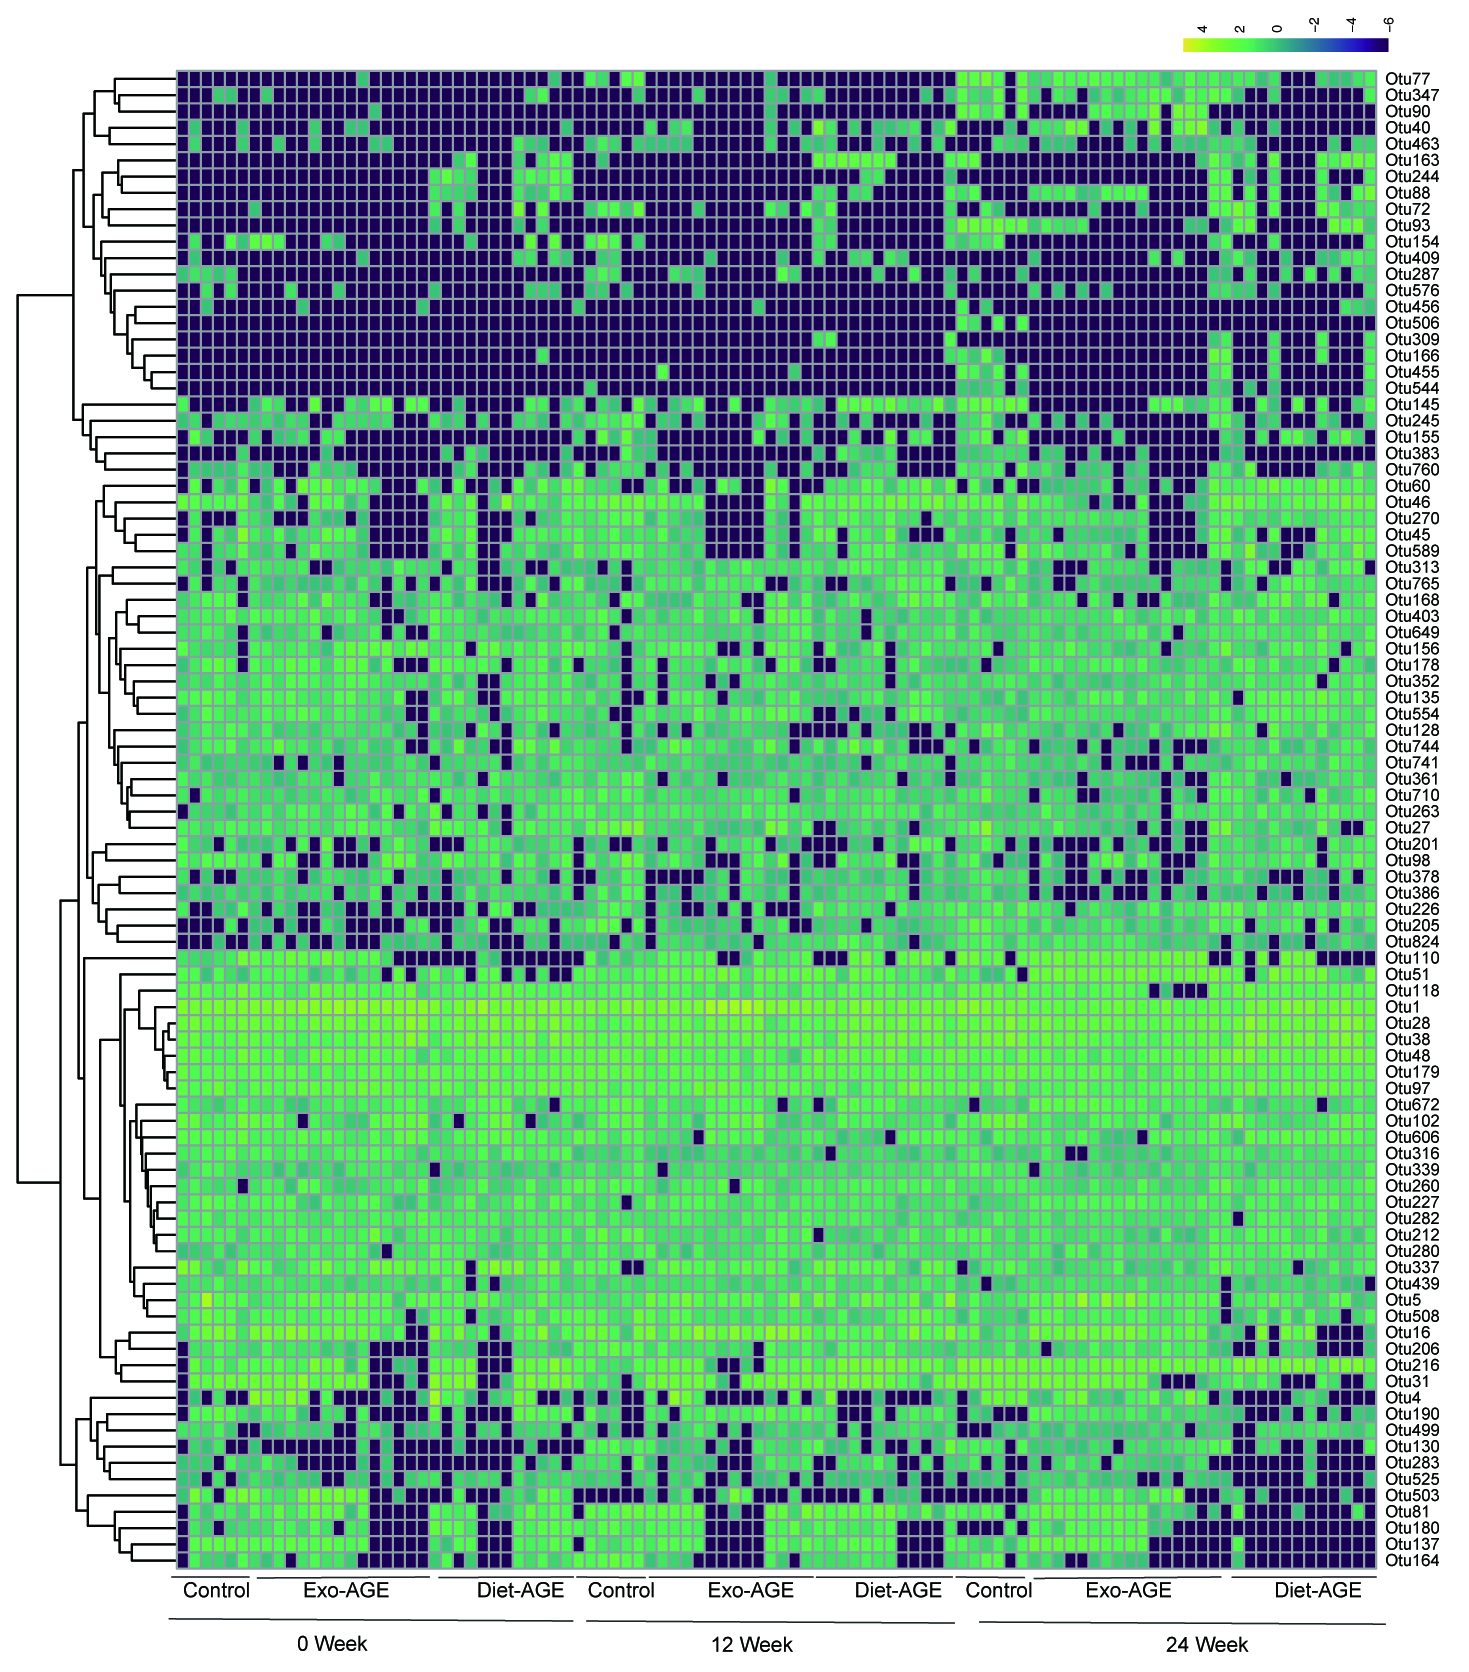


**Figure S3.** Heat map of the relative abundances of 92 key operational taxonomic units (OTUs) related to the alteration of gut microbiota between the three groups. OTUs clustering was according to the complete linkage method for hierarchical clustering.
